# Supplementary material for: Novel iridium complexes with N-heterocyclic dicarbene ligands in light-driven water oxidation catalysis: photon management, ligand effect and catalyst evolution
Source: Royal Society of Chemistry journal article supplement (doi:10.1039/c9dt04841c), 2020-01-01
Supplement: c9dt04841c1.pdf [file c9dt04841c1.pdf]

Electronic Supplementary Information for:

## Novel Iridium complexes with N-heterocyclic dicarbene ligands in light-driven water oxidation catalysis: photon management, ligand effect and catalyst evolution

Andrea Volpe,<sup>a</sup> Mirco Natali,<sup>b</sup> Claudia Graiff,<sup>c</sup> Andrea Sartorel,<sup>a</sup> Cristina Tubaro<sup>a</sup> and Marcella Bonchio<sup>a</sup>

<sup>a</sup> Department of Chemical Sciences, University of Padova, via Marzolo 1, 35131 Padova, Italy.

<sup>b</sup> Department of Chemical and Pharmaceutical Sciences, University of Ferrara, via L. Borsari 46, 44121 Ferrara, Italy.

<sup>c</sup> Department of Chemistry, Life Sciences and Environmental Sustainability, University of Parma, Parco Area delle Scienze 17/A, 43124 Parma, Italy.

### Synthesis of the azolium salts and silver(I) complexes

#### *Synthesis of 1,1'-dimethyl-3,3'-ethylene-5,5'-dibromo-bis(imidazolium) dibromide*

A solution of 5-bromo-1-methyl-imidazole (0.64 g, 3.98 mmol) and 1,2-dibromoethane (0.38 g, 2.02 mmol) in 1,4-dioxane (20 mL) was heated to 100 °C for 24 hours. The mixture was then cooled to room temperature and filtered. The product (white solid) was washed with small portions of diethyl ether and dried under vacuum. Yield 73 %. <sup>1</sup>H NMR (*d*<sub>6</sub>-dmsO):  $\delta$  = 3.78 (s, 6H, CH<sub>3</sub>), 4.68 (s, 4H, CH<sub>2</sub>), 7.98 (s, 2H, CH), 9.23 (s, 2H, NCHN).

#### *General procedure for the synthesis of the Ag(I) complexes*

The proper bis(azolium) salt (1 mmol) and Ag<sub>2</sub>O (2.5 mmol) were placed in a round bottom flask. Under inert atmosphere, deionised water (50 mL) was added and the mixture was stirred for 24 hours under light exclusion. Subsequently, the reaction mixture was filtered through Celite and the filtrate was treated with NH<sub>4</sub>PF<sub>6</sub> (2.1 mmol). The resulting precipitate was filtered off and dried under vacuum.

**2Ag.** White solid. <sup>1</sup>H NMR (*d*<sub>6</sub>-dmsO):  $\delta$  = 3.77 (s, 12H, CH<sub>3</sub>), 4.64 (s, 8H, CH<sub>2</sub>), 7.63 (s, 4H, CH). <sup>13</sup>C NMR (*d*<sub>6</sub>-dmsO):  $\delta$  = 38.1 (CH<sub>3</sub>), 51.4 (CH<sub>2</sub>), 106.5 (CBr), 123.0 (CH), carbene carbon not detected. ESI-MS<sup>+</sup> (CH<sub>3</sub>CN): *m/z* 1057 [Ag<sub>2</sub>L<sub>2</sub>PF<sub>6</sub>]<sup>+</sup>. Anal. Calcd for C<sub>20</sub>H<sub>24</sub>Ag<sub>2</sub>Br<sub>4</sub>F<sub>12</sub>N<sub>8</sub>P<sub>2</sub>: C, 20.07; H, 2.02; N, 9.37%. Found: C, 19.65; H, 1.59; N, 8.62%.

**3Ag.** White solid. <sup>1</sup>H NMR (*d*<sub>6</sub>-dmsO):  $\delta$  = 3.93 (s, 12H, CH<sub>3</sub>), 5.23 (s, 8H, CH<sub>2</sub>), 7.31 (m, 4H, Ar-H), 7.42 (m, 4H, Ar-H), 7.57 (m, 4H, Ar-H), 7.69 (m, 4H, Ar-H). <sup>13</sup>C NMR (*d*<sub>6</sub>-dmsO):  $\delta$  = 35.2 (CH<sub>3</sub>), 47.1 (CH<sub>2</sub>), 112.0 (Ar-CH), 113.1 (Ar-CH), 125.3 (Ar-CH), 135.0 (Ar-C), 188.4 (Ar-C), 191.0 (NCN). ESI-MS<sup>+</sup> (CH<sub>3</sub>CN): *m/z* 940 [Ag<sub>2</sub>L<sub>2</sub>PF<sub>6</sub>]<sup>+</sup>, 398 [Ag<sub>2</sub>L<sub>2</sub>]<sup>2+</sup>.

**Table S1.** Crystallographic data for complexes **2** and **3**.

| Complex                                     | <b>2</b>                                                                            | <b>3</b>                                                            |
|---------------------------------------------|-------------------------------------------------------------------------------------|---------------------------------------------------------------------|
| Empirical formula                           | C <sub>20</sub> H <sub>27</sub> Br <sub>2</sub> ClF <sub>6</sub> IrN <sub>4</sub> P | C <sub>28</sub> H <sub>33</sub> ClF <sub>6</sub> IrN <sub>4</sub> P |
| Formula weight                              | 855.89                                                                              | 798.20                                                              |
| Temperature/K                               | 293(2)                                                                              | 293(2)                                                              |
| Crystal system                              | monoclinic                                                                          | monoclinic                                                          |
| Space group                                 | P2 <sub>1</sub> /n                                                                  | P2 <sub>1</sub> /n                                                  |
| a/Å                                         | 13.798(3)                                                                           | 14.439(3)                                                           |
| b/Å                                         | 12.135(2)                                                                           | 12.898(3)                                                           |
| c/Å                                         | 15.460(3)                                                                           | 15.652(3)                                                           |
| α/°                                         | 90                                                                                  | 90                                                                  |
| β/°                                         | 91.923(3)                                                                           | 92.895(3)                                                           |
| γ/°                                         | 90                                                                                  | 90                                                                  |
| Volume/Å <sup>3</sup>                       | 2587.2(8)                                                                           | 2911.2(11)                                                          |
| Z                                           | 4                                                                                   | 4                                                                   |
| ρ <sub>calc</sub> /cm <sup>3</sup>          | 2.197                                                                               | 1.821                                                               |
| μ/mm <sup>-1</sup>                          | 8.476                                                                               | 4.798                                                               |
| F(000)                                      | 1632.0                                                                              | 1568.0                                                              |
| Crystal size/mm <sup>3</sup>                | 0.18 × 0.17 × 0.15                                                                  | 0.20 × 0.18 × 0.17                                                  |
| Radiation                                   | MoKα (λ = 0.71073)                                                                  | MoKα (λ = 0.71073)                                                  |
| 2θ range for data collection/°              | 3.892 to 61.008                                                                     | 3.744 to 60.97                                                      |
| Index ranges                                | -19 ≤ h ≤ 19, -17 ≤ k ≤ 17,<br>-22 ≤ l ≤ 22                                         | -20 ≤ h ≤ 20, -18 ≤ k ≤ 18,<br>-22 ≤ l ≤ 22                         |
| Reflections collected                       | 41255                                                                               | 44448                                                               |
| Independent reflections                     | 7868 [R <sub>int</sub> = 0.0664, R <sub>sigma</sub> = 0.0504]                       | 8807 [R <sub>int</sub> = 0.0443, R <sub>sigma</sub> = 0.0375]       |
| Data/restraints/parameters                  | 7868/7/341                                                                          | 8807/0/377                                                          |
| Goodness-of-fit on F <sup>2</sup>           | 0.982                                                                               | 1.012                                                               |
| Final R indexes [I ≥ 2σ (I)]                | R <sub>1</sub> = 0.0380, wR <sub>2</sub> = 0.0780                                   | R <sub>1</sub> = 0.0276, wR <sub>2</sub> = 0.0518                   |
| Final R indexes [all data]                  | R <sub>1</sub> = 0.0672, wR <sub>2</sub> = 0.0905                                   | R <sub>1</sub> = 0.0570, wR <sub>2</sub> = 0.0613                   |
| Largest diff. peak/hole / e Å <sup>-3</sup> | 1.45/-1.07                                                                          | 0.93/-0.72                                                          |

$$R_1 = \Sigma |F_o - F_c| / \Sigma (F_o); wR_2 = [\Sigma [w(F_o^2 - F_c^2)^2] / \Sigma [w(F_o^2)^2]]^{1/2}.$$

### Photogeneration of Ru(bpy)<sub>3</sub><sup>3+</sup>

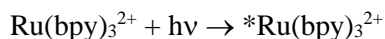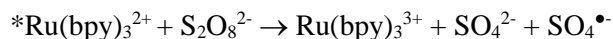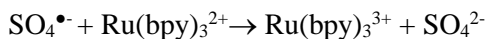

### Oxidation of Ir species

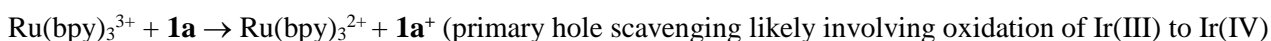

*further oxidation steps by Ru(bpy)<sub>3</sub><sup>3+</sup>, leading to the formation of the catalyst resting state Ir(rest)*

### Water oxidation

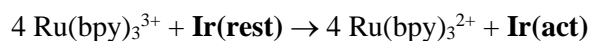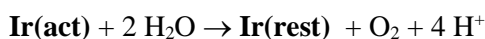

**Scheme S1.** Photocatalytic Ru(bpy)<sub>3</sub><sup>2+</sup>/S<sub>2</sub>O<sub>8</sub><sup>2-</sup> cycle, leading to activation of Ir species, and water oxidation catalysis. Photogeneration of the Ru(bpy)<sub>3</sub><sup>3+</sup> oxidant occurs by light absorption by the Ru(bpy)<sub>3</sub><sup>2+</sup> ( $\lambda_{\text{max}} = 450$  nm,  $\epsilon = 1.4 \times 10^4 \text{ M}^{-1}\text{cm}^{-1}$ ) and generation of a triplet excited state  ${}^*\text{Ru(bpy)}_3^{2+}$ ; reaction of  ${}^*\text{Ru(bpy)}_3^{2+}$  with S<sub>2</sub>O<sub>8</sub><sup>2-</sup> follows (oxidative quenching of the photosensitizer) and generation of Ru(bpy)<sub>3</sub><sup>3+</sup> and of a sulfate radical anion SO<sub>4</sub><sup>•-</sup>; formation of a second equivalent of Ru(bpy)<sub>3</sub><sup>3+</sup> occurs by the reaction of the sulfate radical with Ru(bpy)<sub>3</sub><sup>2+</sup>. Oxidation of Ir species starts from the initial complexes (**1a** is indicated for the sake of simplicity), and after several oxidation steps, involving also the organic ligand scaffold, leads to the catalyst resting state generally indicated as **Ir(rest)**. In the water oxidation, 4 oxidizing equivalents from Ru(bpy)<sub>3</sub><sup>3+</sup> are required to activate **Ir(rest)** to the active form **Ir(act)**, capable of generating oxygen, leading back to the formation of **Ir(rest)**.

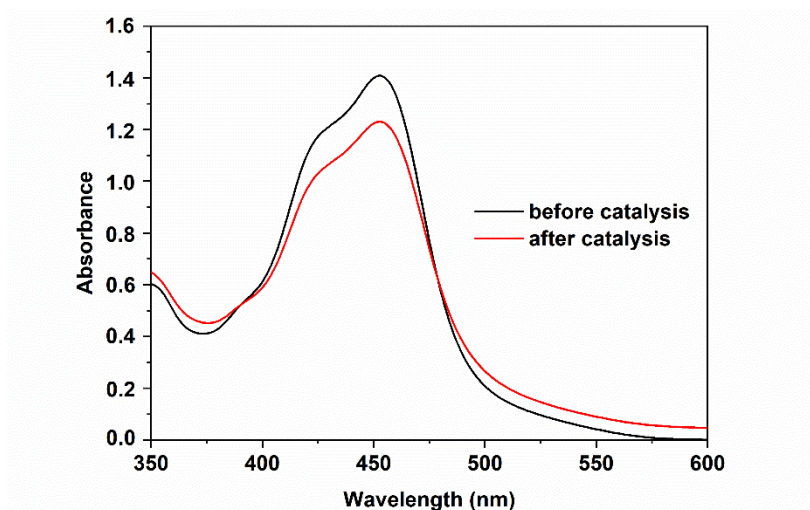

**Figure S1.** UV-Vis of reaction solution before and after light driven water oxidation. Conditions: Reaction conditions: 15 mL of 50 mM  $\text{Na}_2\text{SiF}_6/\text{NaHCO}_3$  buffer, pH 5.2;  $[\text{Ru}(\text{bpy})_3^{2+}] = 1 \text{ mM}$ ;  $[\text{Na}_2\text{S}_2\text{O}_8] = 5 \text{ mM}$ ; **[1a]** = 50  $\mu\text{M}$  (loaded from a 2.5 mM solution in  $\text{CH}_3\text{CN}$ ). Irradiation was performed with a series of six monochromatic LEDs emitting at 450 nm, with  $1.06 \times 10^{-7} \text{ einstein s}^{-1}$  photon flux.

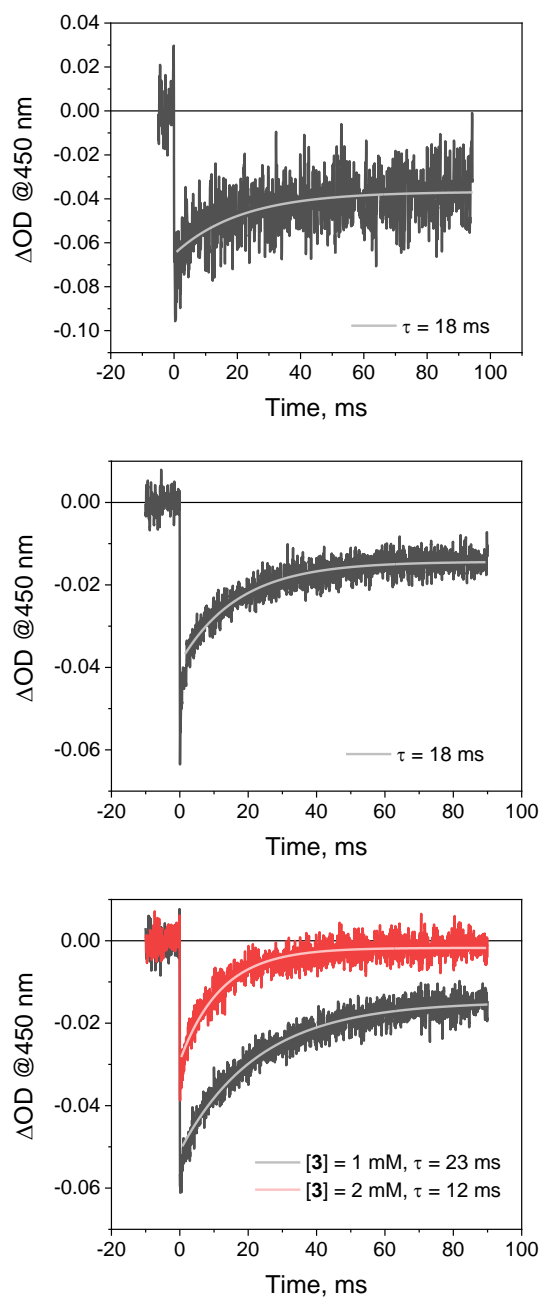

**Figure S2.** Kinetic traces at 450 nm obtained by laser flash photolysis (excitation at 355 nm) of 25/75 acetonitrile/10 mM  $\text{Na}_2\text{SiF}_6/\text{NaHCO}_3$  buffer (pH 5.2) mixtures containing 50  $\mu\text{M}$   $\text{Ru}(\text{bpy})_3\text{Cl}_2 \cdot 6\text{H}_2\text{O}$ , 50 mM  $\text{Na}_2\text{S}_2\text{O}_8$ , and 1 mM **1b** (top), 1 mM **2** (middle), and 1-2 mM **3** (bottom).

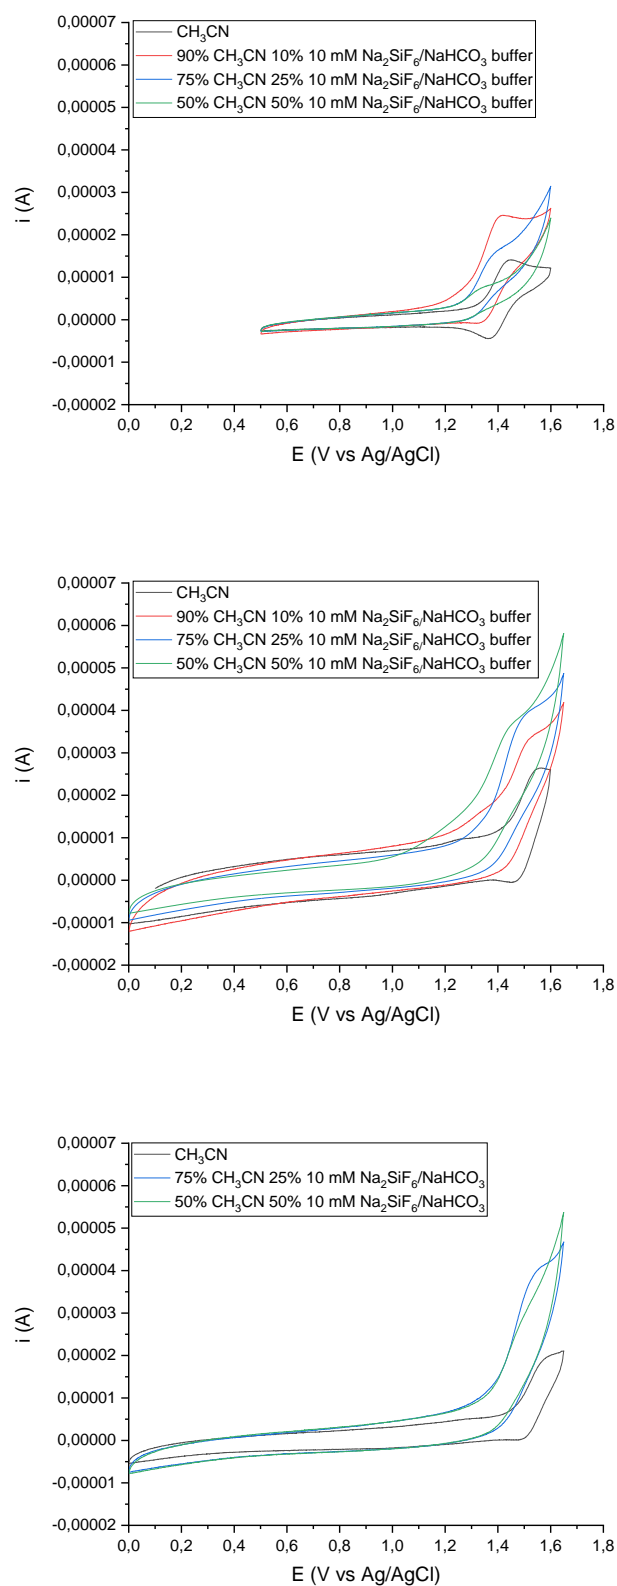

**Figure S3.** Cyclic voltammetries of 1a (top), 2 (middle) and 3 (bottom) in  $\text{CH}_3\text{CN}$  and in the presence of increasing amount of 10 mM aqueous  $\text{Na}_2\text{SiF}_6/\text{NaHCO}_3$  buffer, pH 5.2. 0.1 M  $(\text{Et}_4\text{N})\text{BF}_4$  electrolyte, glassy carbon working electrode, platinum counter electrode, Ag/AgCl reference electrode, scan rate =  $0.1 \text{ V s}^{-1}$ .

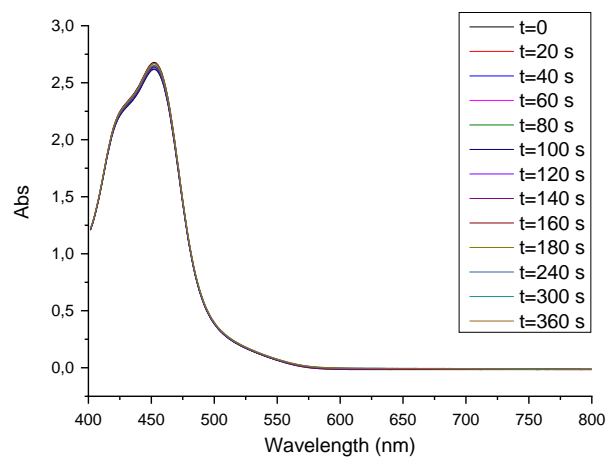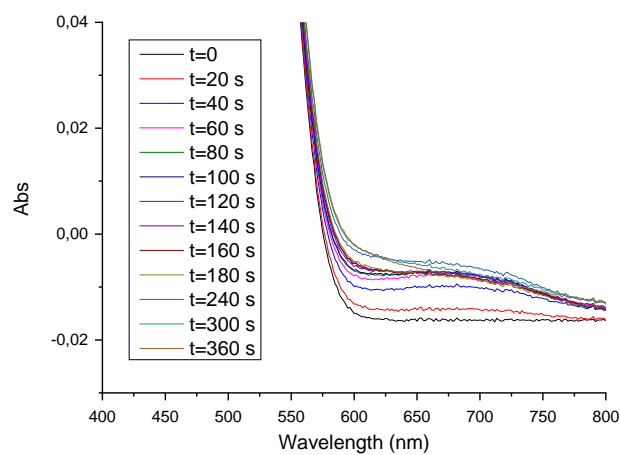

**Figure S4.** Absorbance spectra of a solution containing 200  $\mu\text{M}$  **1a**, 1 mM  $\text{Ru}(\text{bpy})_3^{2+}$ , 5 mM  $\text{S}_2\text{O}_8^{2-}$ , in 50 mM  $\text{Na}_2\text{SiF}_6/\text{NaHCO}_3$  buffer at different times upon illumination with white light ( $3.8 \text{ mW cm}^{-2}$  at 20 cm distance) at 0-360 s irradiation. The experiment was performed in a cuvette with 2 mm optical path.. Differential traces are reported in Figure 7 the main manuscript.

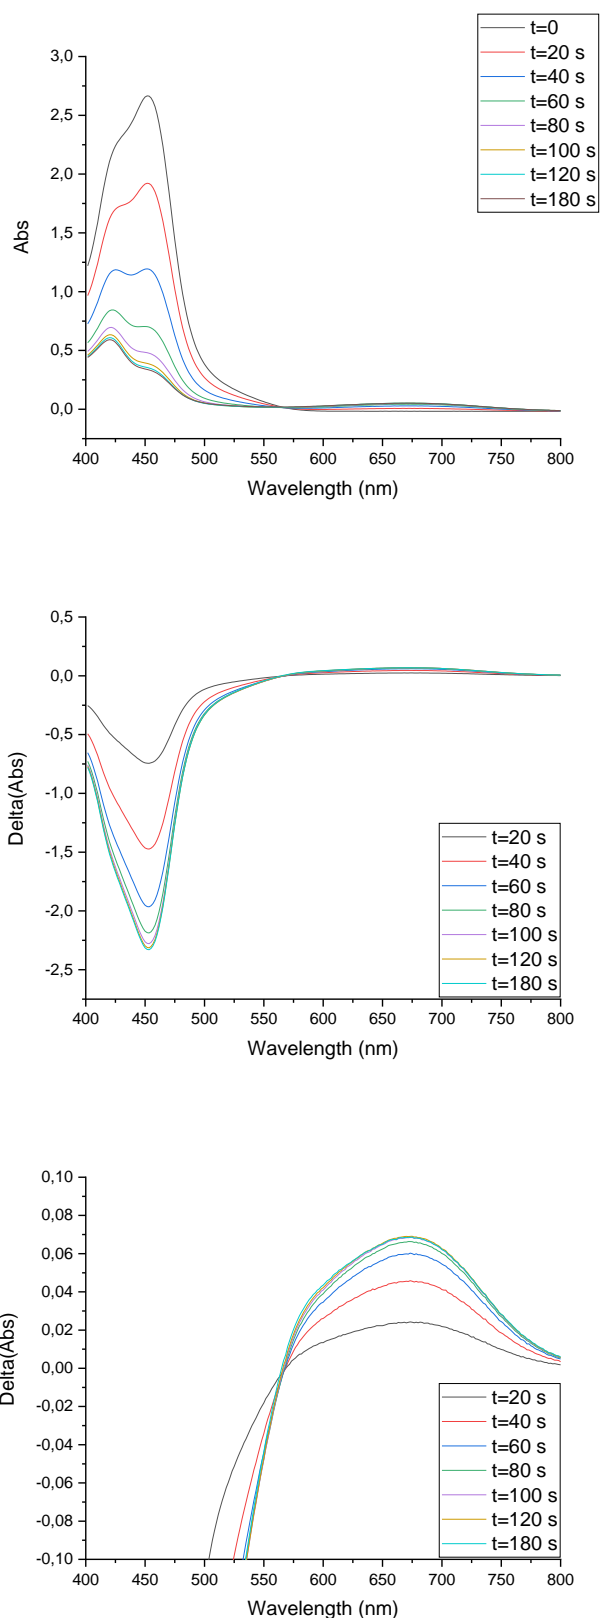

**Figure S5.** Top: absorbance spectra of a solution containing 1 mM  $\text{Ru}(\text{bpy})_3^{2+}$ , 5 mM  $\text{S}_2\text{O}_8^{2-}$ , in 50 mM  $\text{Na}_2\text{SiF}_6/\text{NaHCO}_3$  buffer at different times upon illumination with white light ( $3.8 \text{ mW cm}^{-2}$  at 20 cm distance) at 0-180 s irradiation. The experiment was performed in a cuvette with 2 mm optical path. Middle and bottom: Differential traces.

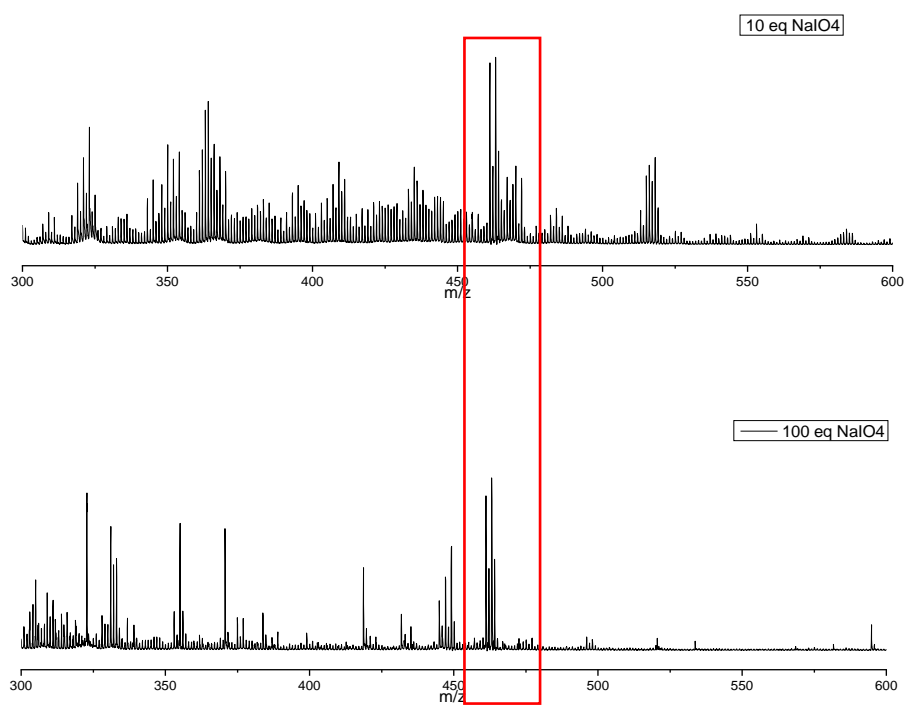

**Figure S6.** MALDI spectra of a solution of **1a** treated with 10-100 equivalents of NaIO<sub>4</sub>.

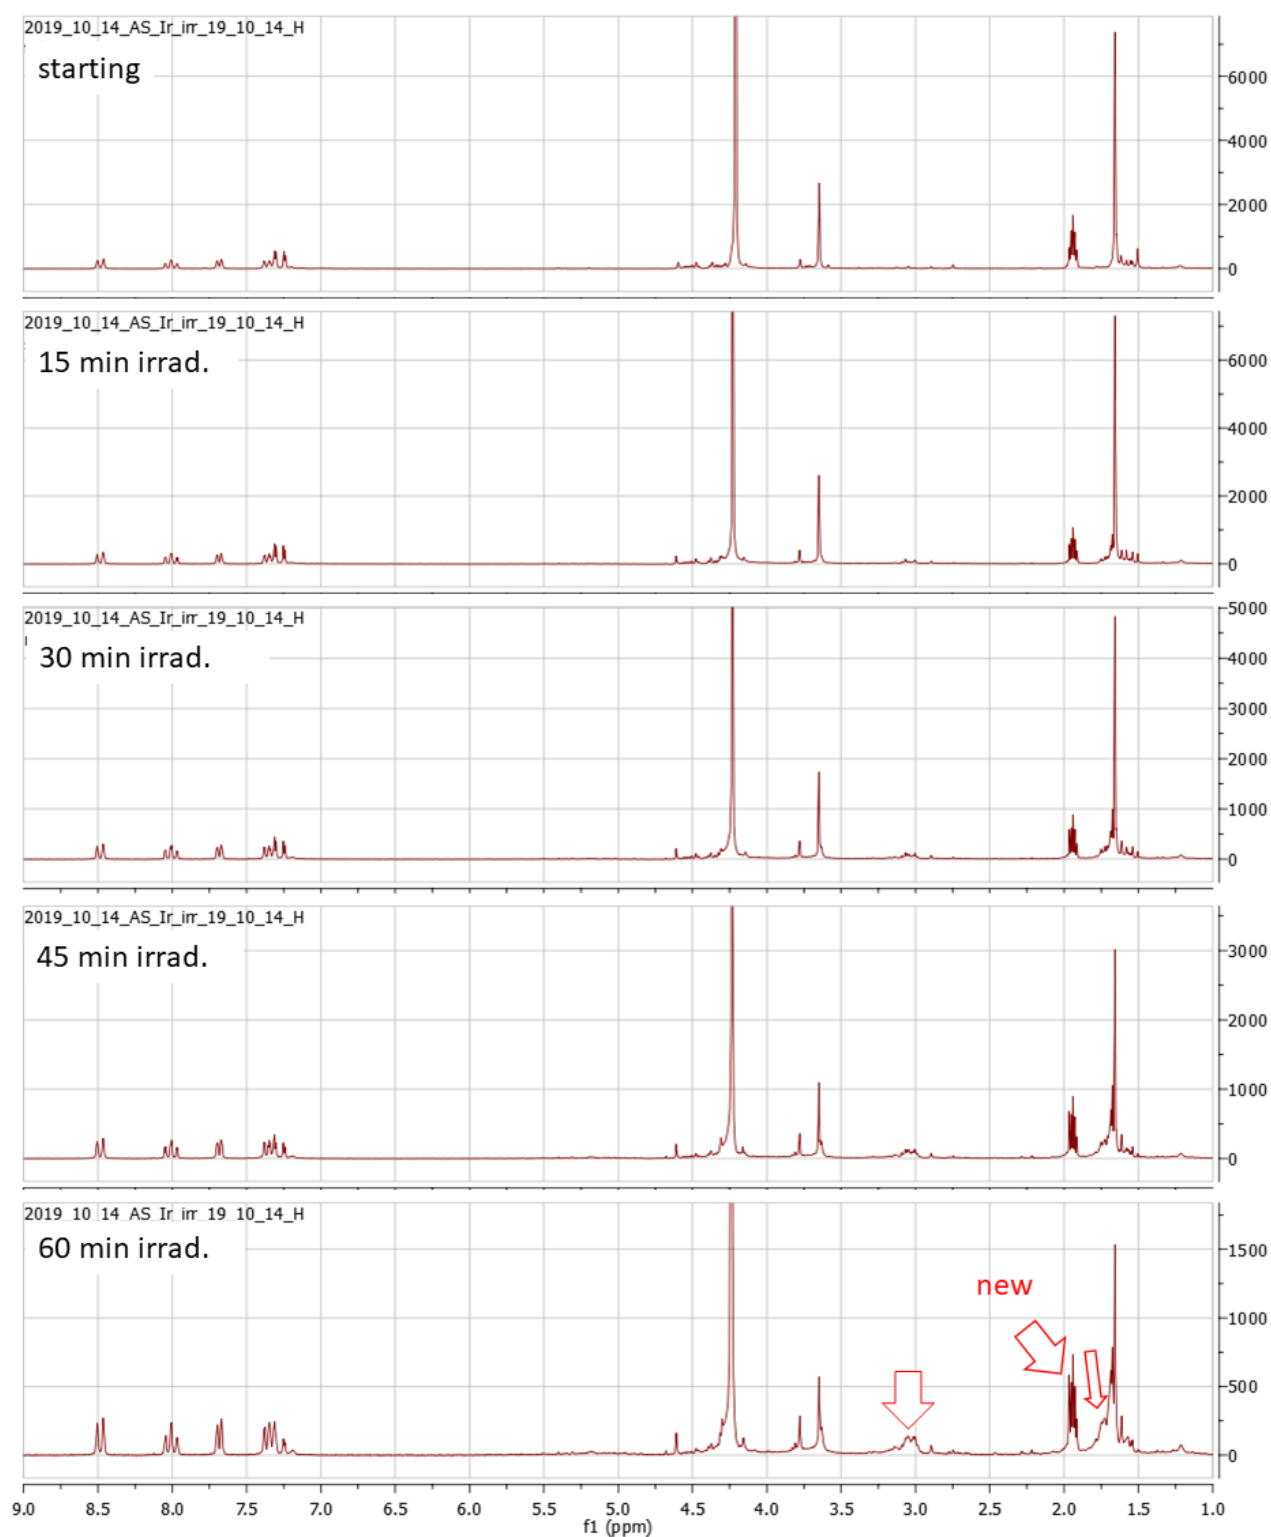

**Figure S7.**  $^1\text{H}$ -NMR spectra of a 500  $\mu\text{l}$  solution (50%  $\text{CD}_3\text{CN}$  / 50% 2.2 mM  $\text{Na}_2\text{SiF}_6$ +2.8 mM  $\text{NaHCO}_3$  in  $\text{D}_2\text{O}$ ), containing 5 mM **1a**, 1 mM  $\text{Ru}(\text{bpy})_3^{2+}$ , 40 mM  $\text{Na}_2\text{S}_2\text{O}_8$ , under illumination with white light.

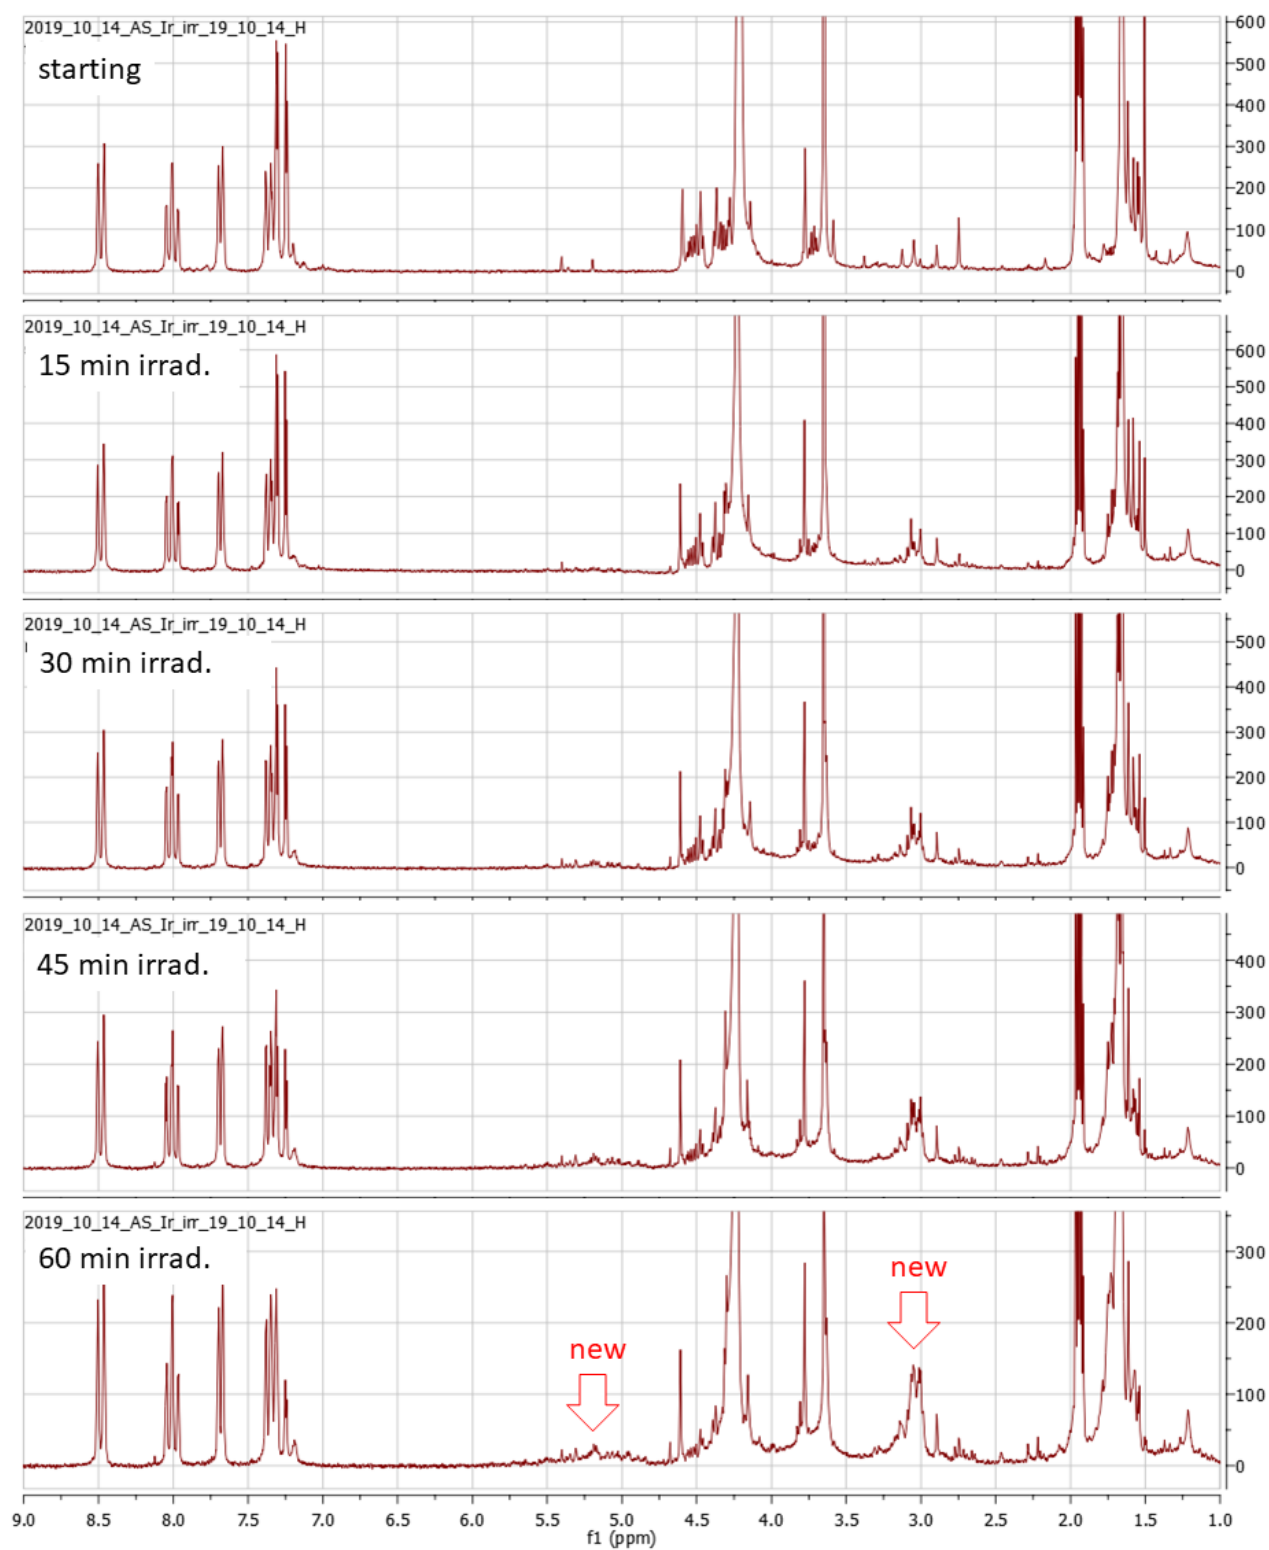

**Figure S7 (continues).**  $^1\text{H}$ -NMR spectra of a 500  $\mu\text{l}$  solution (50%  $\text{CD}_3\text{CN}$  / 50% 2.2 mM  $\text{Na}_2\text{SiF}_6$ +2.8 mM  $\text{NaHCO}_3$  in  $\text{D}_2\text{O}$ ), containing 5 mM **1a**, 1 mM  $\text{Ru}(\text{bpy})_3^{2+}$ , 40 mM  $\text{Na}_2\text{S}_2\text{O}_8$ , under illumination with white light.

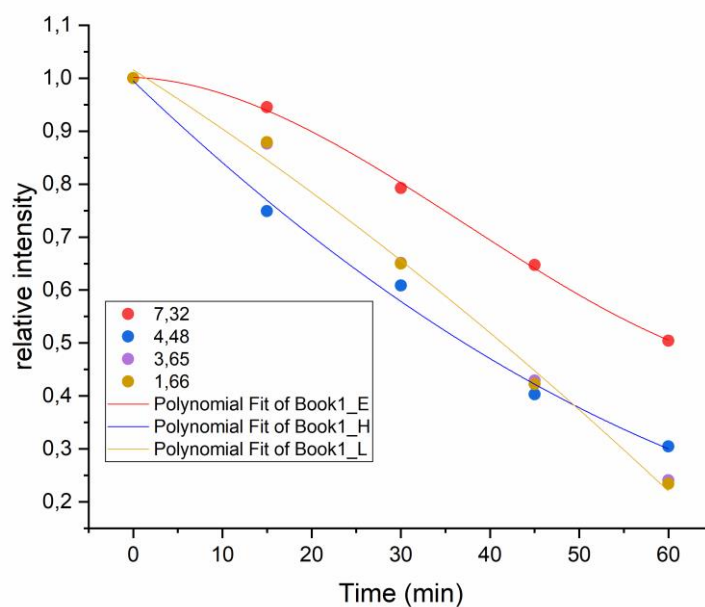

**Figure S8.** Height of the  $^1\text{H}$ -NMR signals vs time along the irradiation of a 500  $\mu\text{l}$  solution (50%  $\text{CD}_3\text{CN}$  / 50% 2.2 mM  $\text{Na}_2\text{SiF}_6$ +2.8 mM  $\text{NaHCO}_3$  in  $\text{D}_2\text{O}$ ), containing 5 mM **1a**, 1 mM  $\text{Ru}(\text{bpy})_3^{2+}$ , 40 mM  $\text{Na}_2\text{S}_2\text{O}_8$ , under illumination with white light. The height was normalised with respect to the signal at 8.5 ppm and due to  $\text{Ru}(\text{bpy})_3^{2+}$ . The height was used instead of the integration, given the complexity of the  $^1\text{H}$ -NMR spectra and to the difficulty in integrating the signals. Attribution: signal at 7.32 ppm (red dots, C-H of the heterocyclic ring); signal at 4.48 ppm (blue dots, (N)- $\text{CH}_2$ ), signal at 3.65 ppm (purple dots, (N)- $\text{CH}_3$ ), 1.66 ppm ( $\text{CH}_3$  of the  $\text{Cp}^*$ ).

## NMR spectra of new compounds

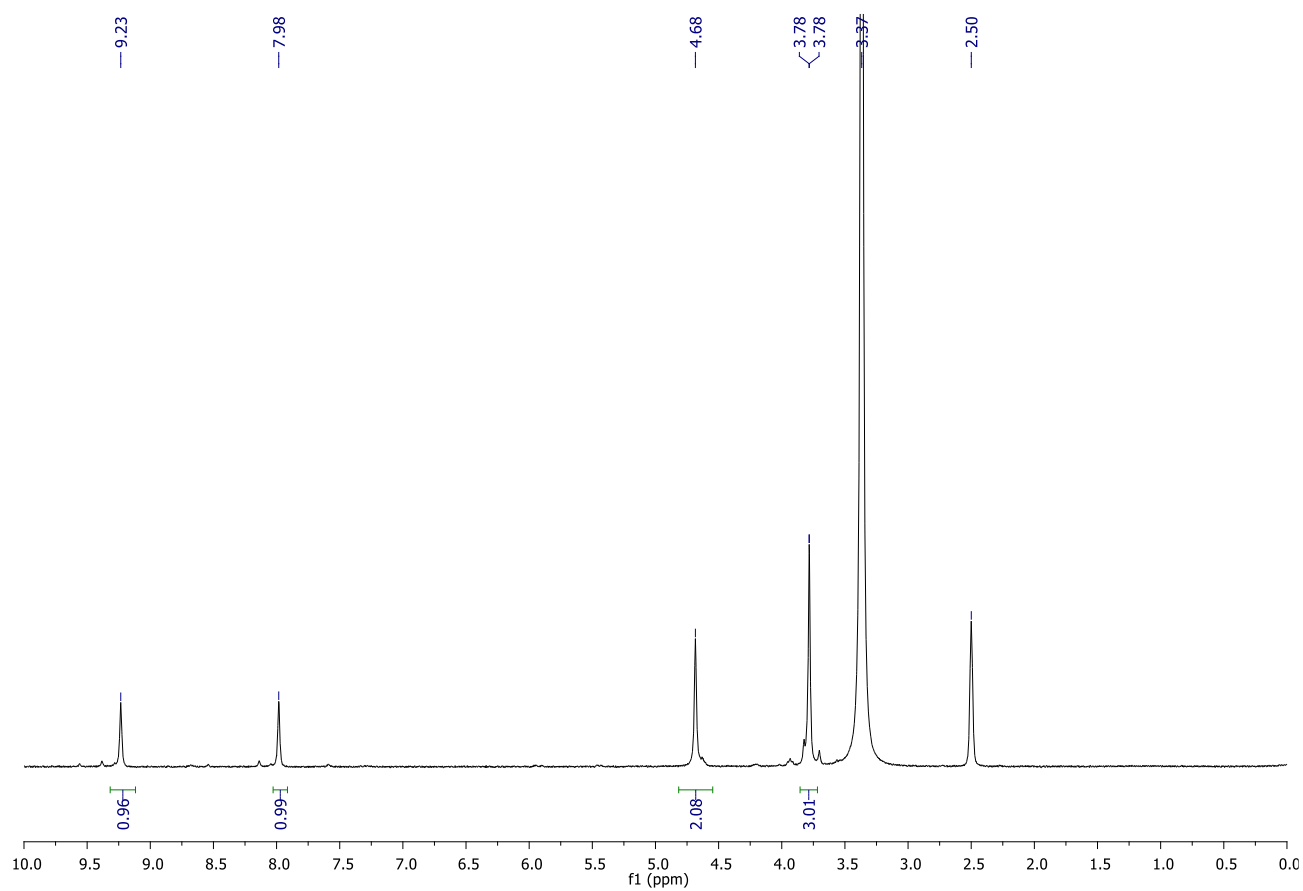

**Figure S9.**  $^1\text{H}$  NMR spectrum of the diazolium salt 1,1'-dimethyl-3,3'-ethylene-5,5'-dibromobis(imidazolium) dibromide in  $\text{DMSO}-d_6$ .

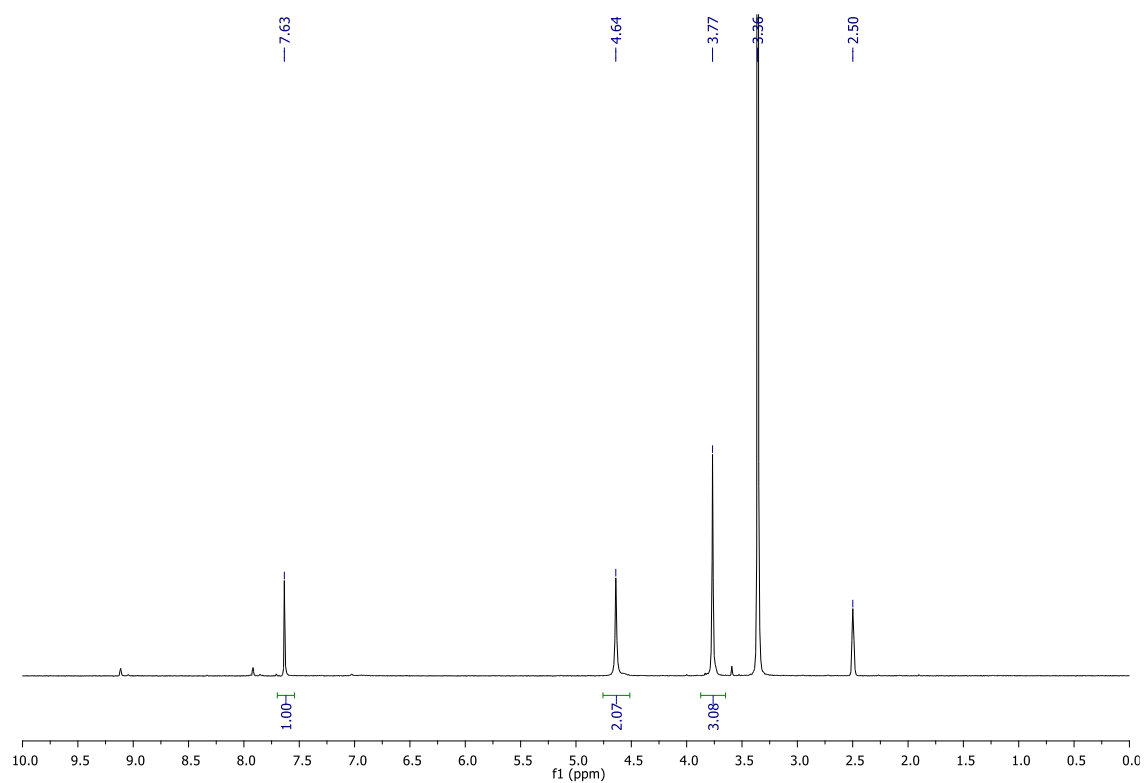

**Figure S10.**  $^1\text{H}$  NMR spectrum of the silver complex **Ag2** in  $\text{DMSO}-d_6$ .

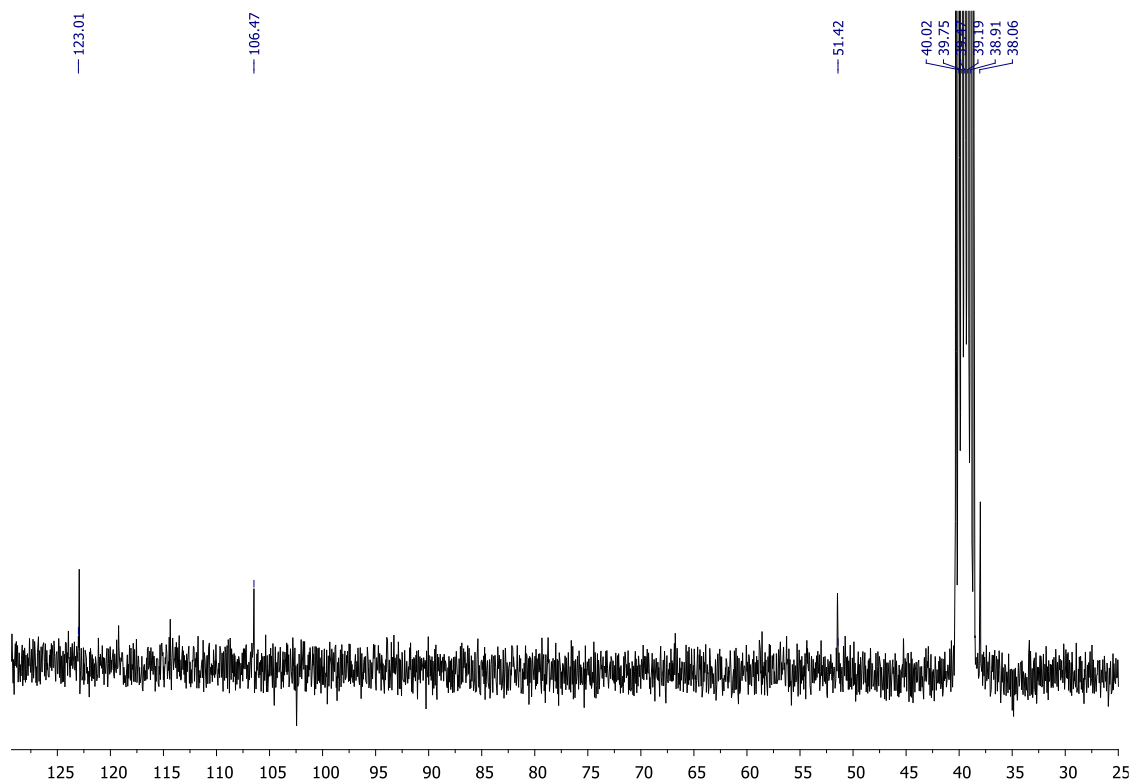

**Figure S11.**  $^{13}\text{C}\{^1\text{H}\}$  NMR spectrum of complex **Ag2** in  $\text{DMSO}-d_6$ .

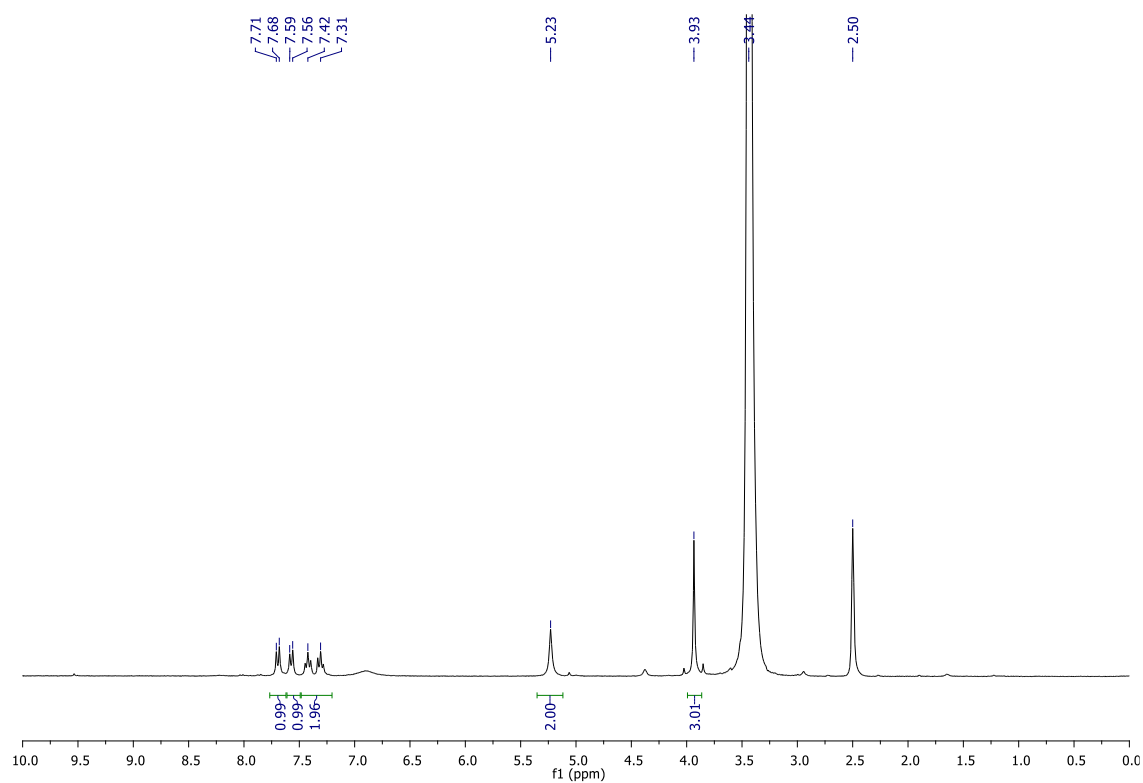

**Figure S12.** <sup>1</sup>H NMR spectrum of the silver complex **Ag3** in DMSO-*d*<sub>6</sub>.

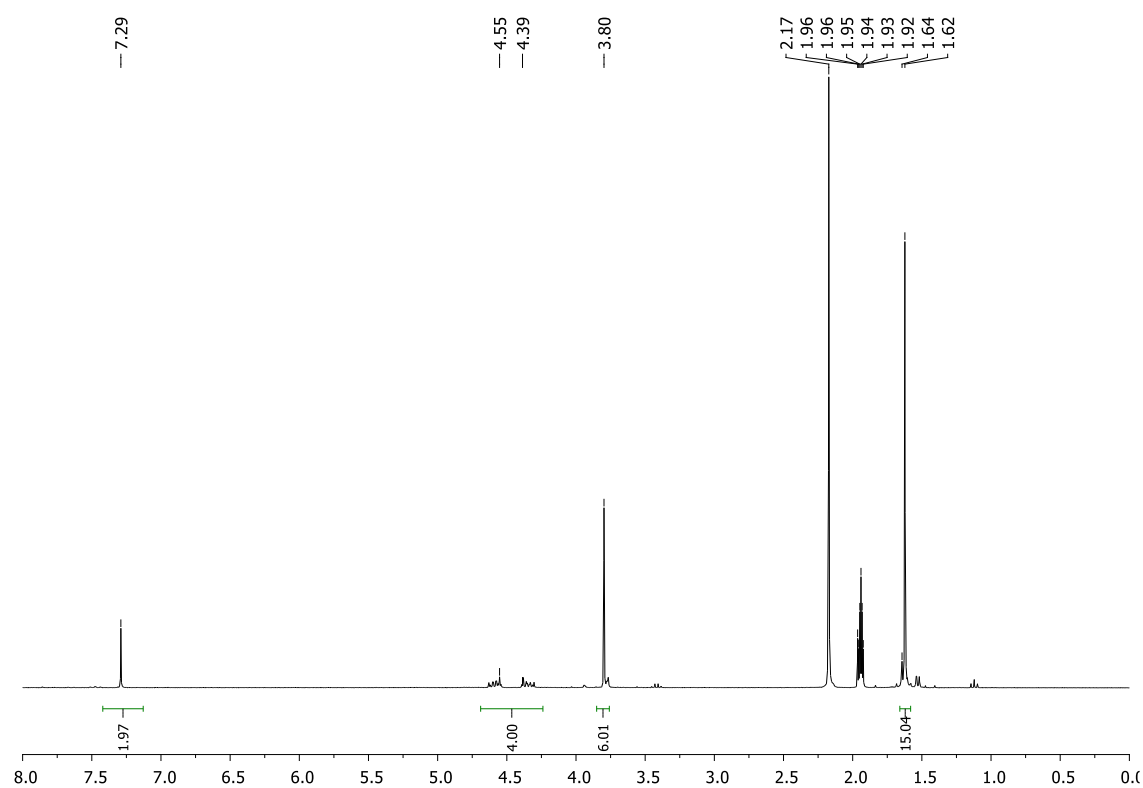

**Figure S13.** <sup>1</sup>H NMR spectrum of complex **2** in CD<sub>3</sub>CN.

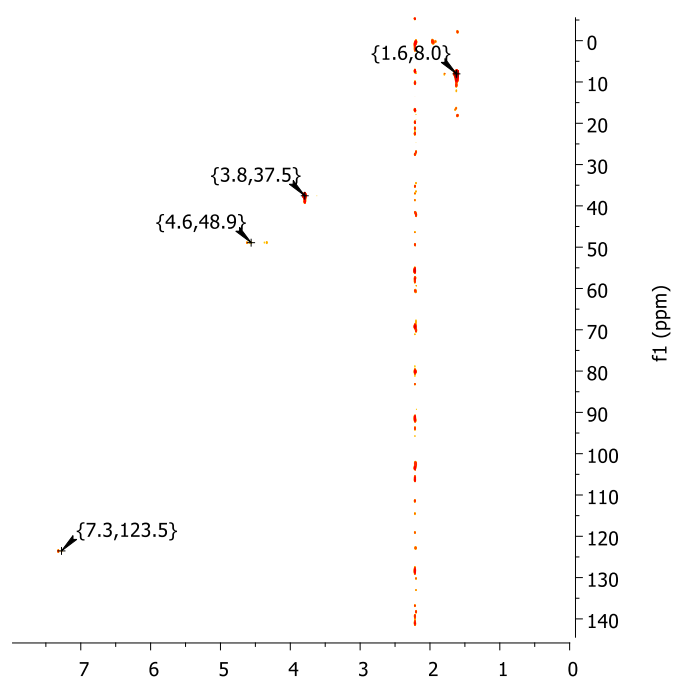

**Figure S14.**  $^{13}\text{C}$ ,  $^1\text{H}$  HMQC NMR spectrum of complex **2** in  $\text{CD}_3\text{CN}$ .

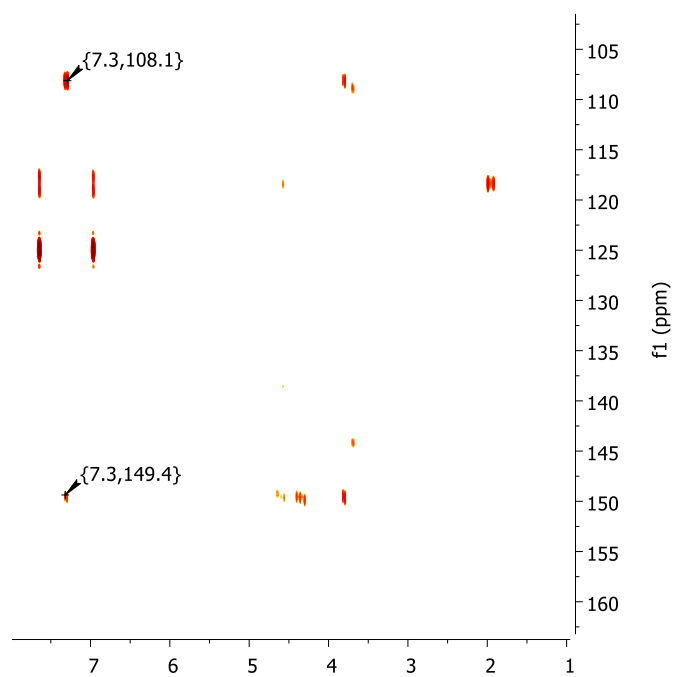

**Figure S15.**  $^{13}\text{C}$ ,  $^1\text{H}$  HMBC NMR spectrum of complex **2** in  $\text{CD}_3\text{CN}$ ; detail on the CBr and carbene carbon cross-peaks.

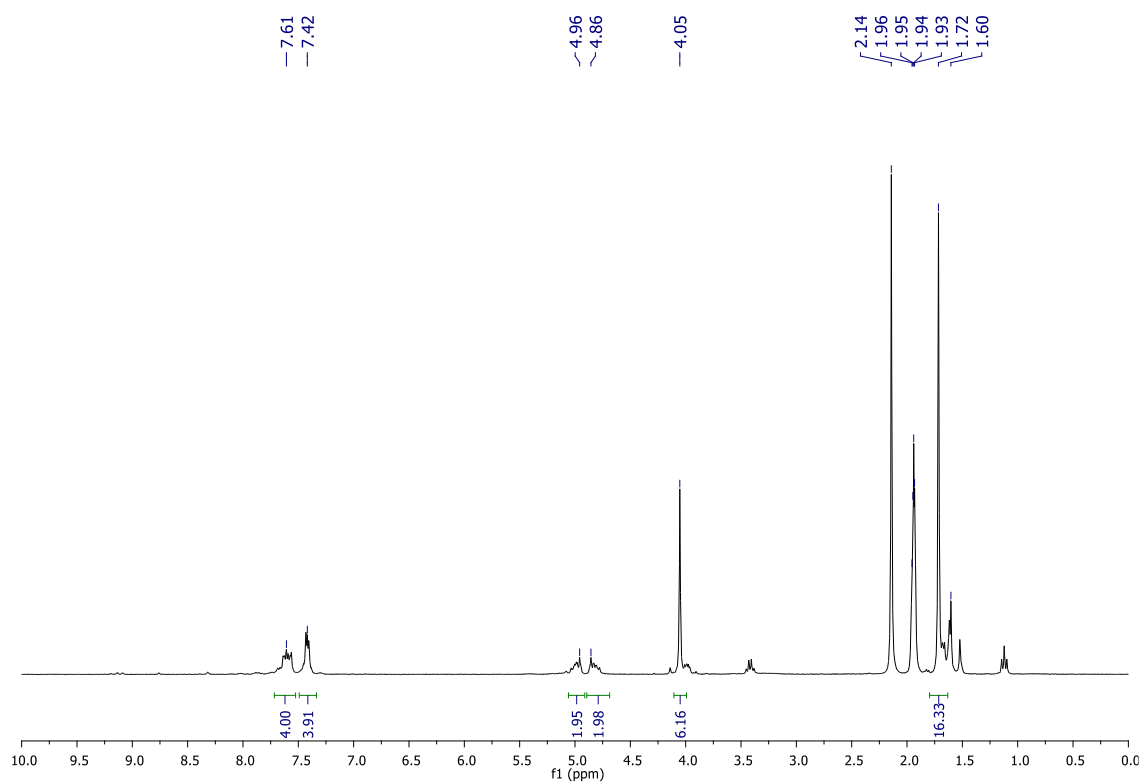

**Figure S16.** <sup>1</sup>H NMR spectrum of complex **3** in CD<sub>3</sub>CN.

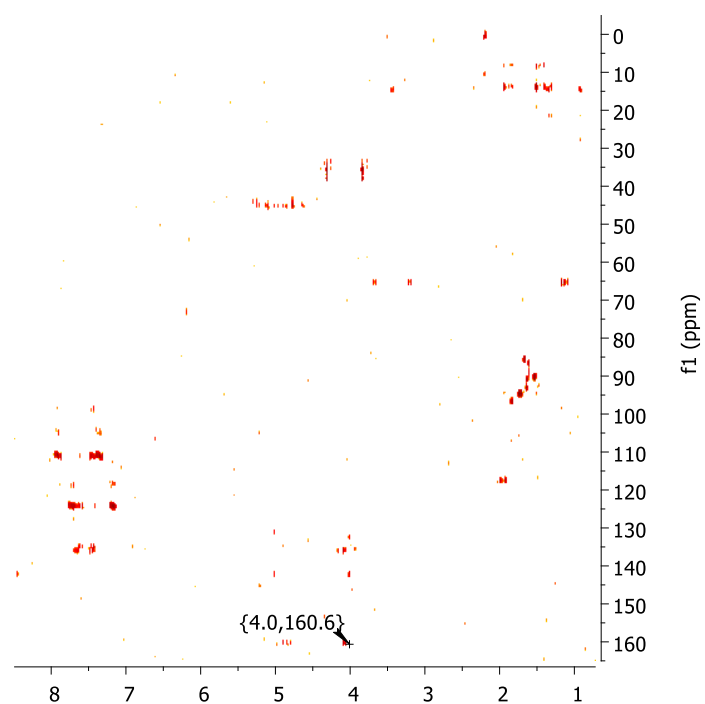

**Figure S17.** <sup>13</sup>C, <sup>1</sup>H HMBC NMR spectrum of complex **3** in CD<sub>3</sub>CN; detail on the carbene carbon cross-peaks.

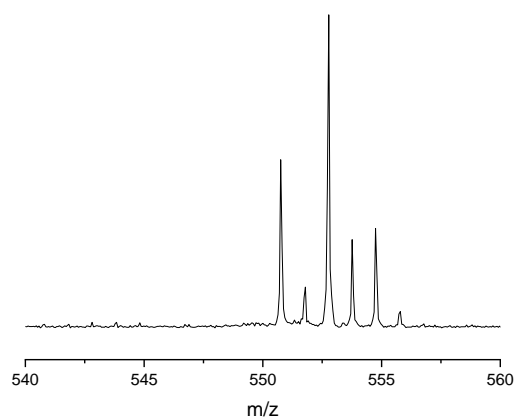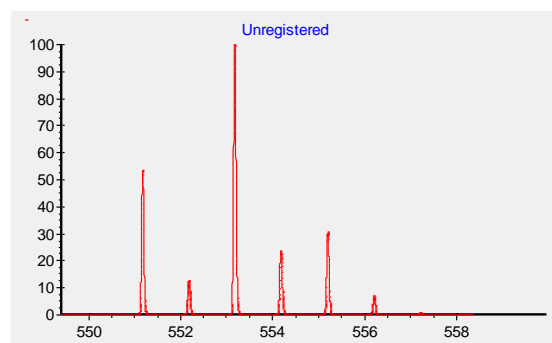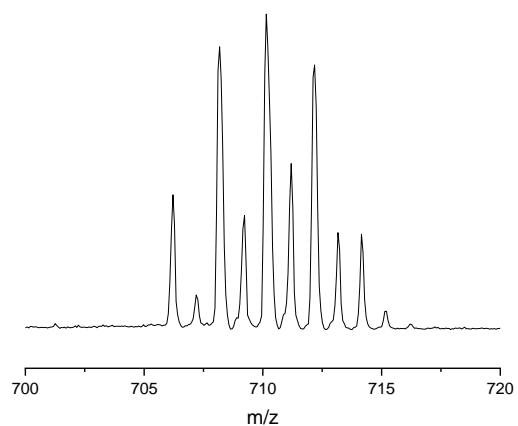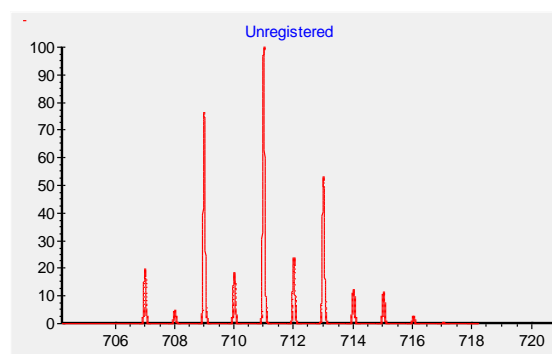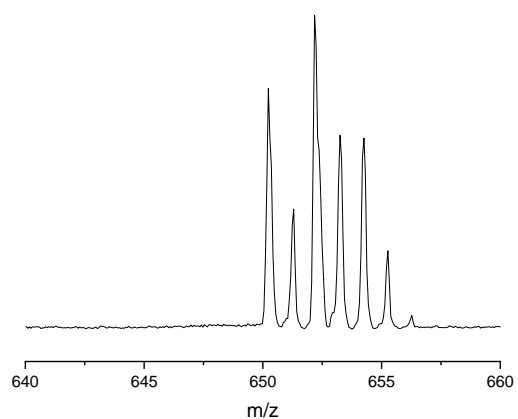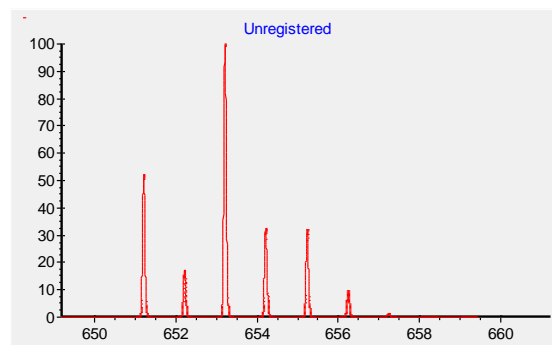

**Figure S18.** MALDI-MS signals of **1a** (top), **2** (middle) and **3** (bottom) with simulated isotopic patterns for the corresponding  $[\text{IrClCp}^*\text{diNHC}]^+$  ions.
